# Supplementary material
Source: PubMed Central journal article supplement (PMC9804619)
Supplement: BPH-179-5196-s001.pdf [file BPH-179-5196-s001.pdf]

## Supplementary Information

### Exploring pharmacological inhibition of G<sub>q/11</sub> as an analgesic strategy.

Subhi Marwari, Cody Kowalski and Kirill A. Martemyanov\*

*Department of Neuroscience, The Scripps Research Institute, 130 Scripps Way, Jupiter, FL, 33458, USA*

**Running Title:** Antinociceptive effect of G<sub>q/11</sub> inhibition in mice.

**\*Correspondence to:**

Kirill A. Martemyanov, PhD

Department of Neuroscience

The Scripps Research Institute,

130 Scripps Way, Jupiter, FL, 33458, USA

Email: [kirill@scripps.edu](mailto:kirill@scripps.edu) (K.A.M.)

Phone: (561) 228-2270

**This PDF file includes:**

Figures S1 to S6

## Supplementary Figures

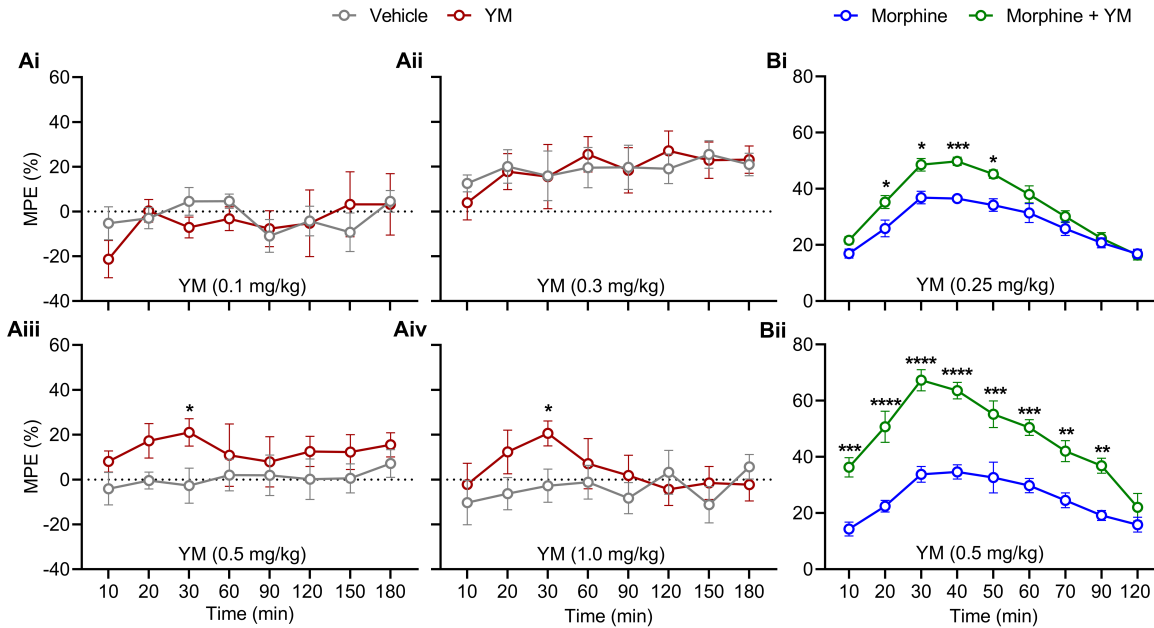

### Supplementary Figure S1. The effect of systemic subcutaneous administration of YM on nociception.

**A.** Dose-response effect of different concentration of subcutaneous YM and vehicle were tested on hot plate test for 3 h. **Ai.** YM 0.1 mg/kg: Treatment  $F_{(1, 80)} = 0.31$ , time  $F_{(7, 80)} = 0.84$ , interaction  $F_{(7, 80)} = 0.59$ . **Aii.** YM 0.3 mg/kg: Treatment  $F_{(1, 80)} = 0.001$ , time  $F_{(7, 80)} = 0.76$ , interaction  $F_{(7, 80)} = 0.20$ . **Aiii.** YM 0.5 mg/kg: Treatment  $F_{(1, 80)} = 10.27$ , time  $F_{(7, 80)} = 0.26$ , interaction  $F_{(7, 80)} = 0.26$ . **Aiv.** YM 1 mg/kg: Treatment  $F_{(1, 80)} = 3.62$ , time  $F_{(7, 80)} = 0.81$ , interaction  $F_{(7, 80)} = 0.90$ . Two-way ANOVA with Bonferroni's post hoc test. **B.** Time course effect of combined administration of subcutaneous YM (0.25 and 0.5 mg/kg) with single dose of subcutaneous morphine (5 mg/kg) on hot plate test for 2 h. YM was administered 10 min before the administration of morphine. **Bi.** YM 0.25 mg/kg: Treatment  $F_{(1, 90)} = 46.32$ , time  $F_{(8, 90)} = 44.07$ , interaction  $F_{(8, 90)} = 2.44$ . **Bii.** YM 0.5 mg/kg: Treatment  $F_{(1, 90)} = 177.8$ , time  $F_{(8, 90)} = 19.30$ , interaction  $F_{(8, 90)} = 2.62$ . Two-way ANOVA with Bonferroni's post hoc test. N = 6 mice/group. In all panels statistical analysis was performed combining both sexes and significance was \* $p < 0.05$  and \*\* $p < 0.001$ , data sets (mean  $\pm$  SEM) as analyzed using two-way ANOVA with Bonferroni's post hoc tests.

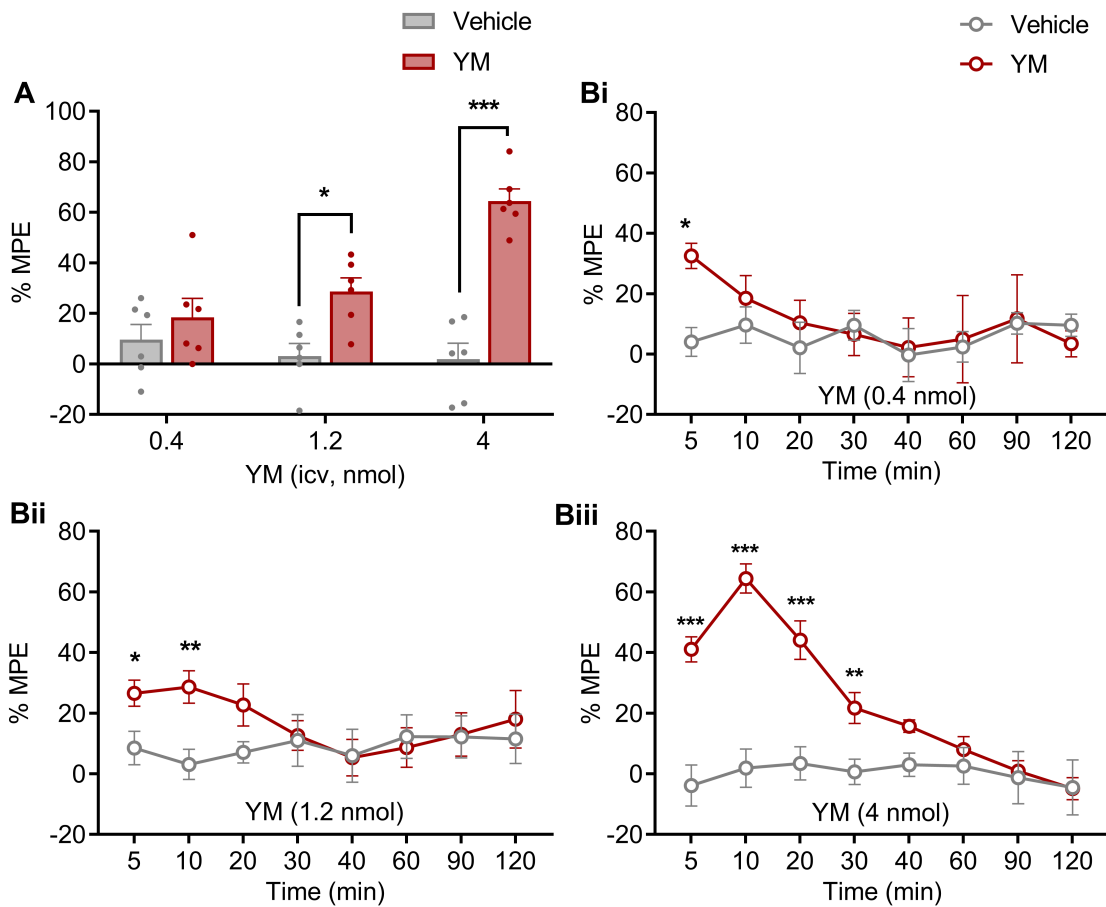

### Supplementary Figure S2. The effect of intracerebroventricular injection of YM on nociception

**A.** Dose-response effect of different concentration of i.c.v. YM (0.4, 1.2, 4 nmol) and vehicle were tested on hot plate test after 10 min of administration. Treatment  $F_{(1, 30)} = 45.04$ , dose  $F_{(2, 30)} = 6.40$ , interaction  $F_{(2, 30)} = 10.86$ . Two-way ANOVA with Bonferroni's post hoc test. **B.** Time course effect of different concentration of i.c.v. YM and vehicle were tested on hot plate test for 2 h. **Bi.** YM 0.4 nmol: Treatment  $F_{(1, 5)} = 0.62$ , time  $F_{(7, 35)} = 1.57$ , interaction  $F_{(7, 35)} = 1.55$ . **Bii.** YM 1.2 nmol: Treatment  $F_{(1, 5)} = 2.28$ , time  $F_{(7, 35)} = 0.97$ , interaction  $F_{(7, 35)} = 3.45$ . **Biii.** YM 4 nmol: Treatment  $F_{(1, 5)} = 17.86$ , time  $F_{(7, 35)} = 13.54$ , interaction  $F_{(7, 35)} = 15.30$ . Two-way ANOVA with Bonferroni's post hoc test.  $N = 6$  mice/group. In all panels statistical analysis was performed combining both sexes and significance was  $*p < 0.05$  and  $**p < 0.001$ , data sets (mean  $\pm$  SEM) as analyzed using two-way ANOVA with Bonferroni's post hoc tests.

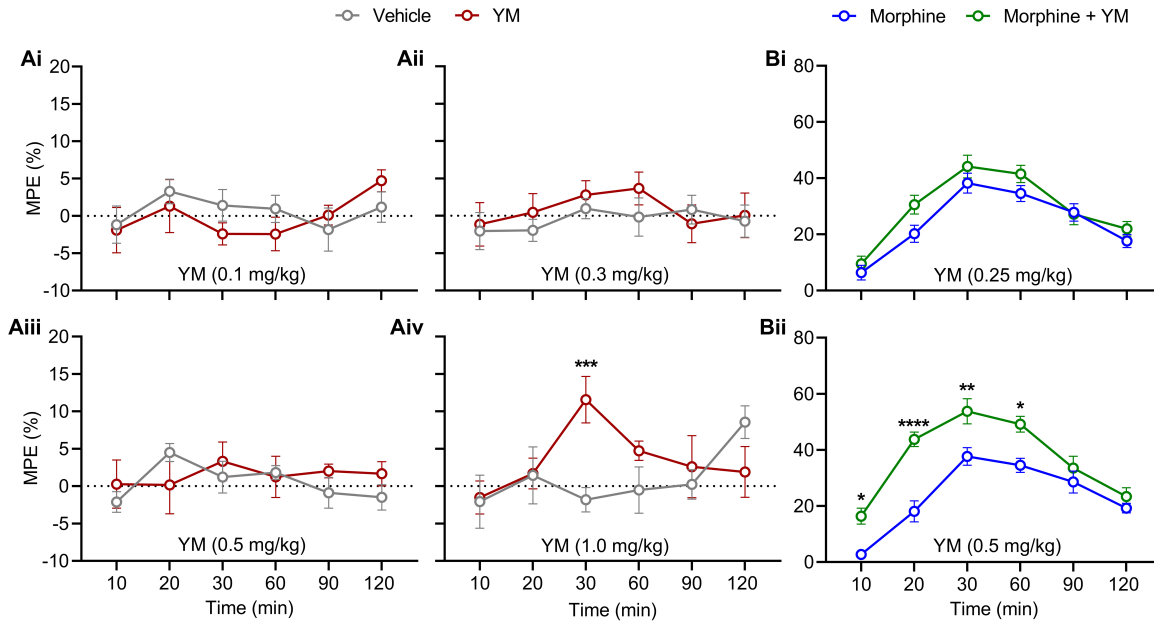

**Supplementary Figure S3. The effect of systemic subcutaneous administration of YM on spinal analgesia.**

**A.** Dose-response effect of different concentration of subcutaneous YM and vehicle were tested on tail immersion test for 2 h. **Ai.** YM 0.1 mg/kg: Treatment  $F_{(1, 60)} = 0.32$ , time  $F_{(5, 60)} = 1.34$ , interaction  $F_{(5, 60)} = 0.84$ . **Aii.** YM 0.3 mg/kg: Treatment  $F_{(1, 60)} = 0.96$ , time  $F_{(5, 60)} = 0.73$ , interaction  $F_{(5, 60)} = 0.35$ . **Aiii.** YM 0.5 mg/kg: Treatment  $F_{(1, 60)} = 0.55$ , time  $F_{(5, 60)} = 0.69$ , interaction  $F_{(5, 60)} = 0.86$ . **Aiv.** YM 1 mg/kg: Treatment  $F_{(1, 60)} = 2.37$ , time  $F_{(5, 60)} = 1.65$ , interaction  $F_{(5, 60)} = 2.70$ . Two-way ANOVA with Bonferroni's post hoc test. **B.** Time course effect of combined administration of subcutaneous YM (0.25 and 0.5 mg/kg) with single dose of subcutaneous morphine (5 mg/kg) on tail immersion test for 2 h. YM was administered 10 min before the administration of morphine. **Bi.** YM 0.25 mg/kg: Treatment  $F_{(1, 60)} = 7.28$ , time  $F_{(5, 60)} = 30.48$ , interaction  $F_{(5, 60)} = 0.71$ . **Bii.** YM 0.5 mg/kg: Treatment  $F_{(1, 60)} = 52.40$ , time  $F_{(5, 60)} = 35.48$ , interaction  $F_{(5, 50)} = 3.17$ . Two-way ANOVA with Bonferroni's post hoc test. N = 6 mice/group. In all panels statistical analysis was performed combining both sexes and significance was \* $p < 0.05$ , \*\* $p < 0.001$ , \*\*\* $p < 0.0001$  and \*\*\*\* $p < 0.00001$ , data sets (mean  $\pm$  SEM) as analyzed using two-way ANOVA with Bonferroni's post hoc tests.

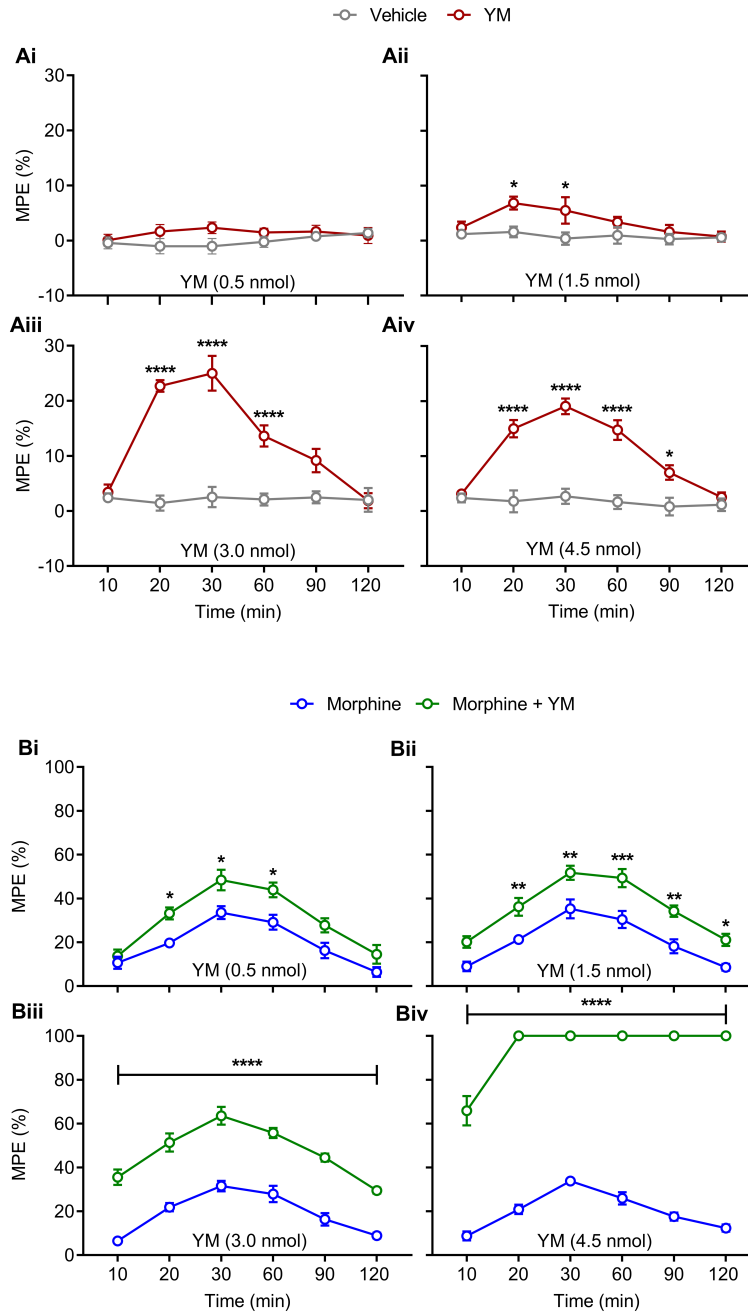

**Supplementary Figure S4: The effect of local intrathecal administration of YM on spinal analgesia.**

**A.** Dose-response effect of different concentration of intrathecal YM and vehicle were tested on tail immersion test for 2 h. **Ai.** YM 0.5 nmol: Treatment  $F_{(1, 60)} = 4.92$ , time  $F_{(5, 60)} = 0.44$ , interaction  $F_{(5, 60)} = 0.80$ . **Aii.** YM 1.5 nmol: Treatment  $F_{(1, 60)} = 13.63$ , time  $F_{(5, 60)} = 2.38$ , interaction  $F_{(5, 60)} = 1.57$ . **Aiii.** YM 3.0 nmol: Treatment  $F_{(1, 60)} = 109.7$ , time  $F_{(5, 60)} = 15.41$ , interaction  $F_{(5, 60)} = 16.01$ . **Aiv.** YM 4.5 nmol: Treatment  $F_{(1, 60)} = 116.1$ , time  $F_{(5, 60)} = 14.21$ , interaction  $F_{(5, 60)} = 11.88$ . Two-way ANOVA with Bonferroni's post hoc test. **B.** Time course

effect of combined administration of intrathecal YM with single dose of subcutaneous morphine (2.5 mg/kg) on tail immersion test for 2 h. YM was administered 10 min before the administration of morphine. **Bi.** YM 0.5 nmol: Treatment  $F_{(1, 10)} = 15.40$ , time  $F_{(5, 50)} = 39.79$ , interaction  $F_{(5, 50)} = 1.38$ . **Bii.** YM 1.5 nmol: Treatment  $F_{(1, 60)} = 68.29$ , time  $F_{(5, 60)} = 29.80$ , interaction  $F_{(5, 60)} = 0.40$ . **Biii.** YM 3.0 nmol: Treatment  $F_{(1, 60)} = 306.3$ , time  $F_{(5, 60)} = 33.79$ , interaction  $F_{(5, 60)} = 0.99$ . **Biv.** YM 4.5 nmol: Treatment  $F_{(1, 48)} = 3103$ , time  $F_{(5, 48)} = 40.06$ , interaction  $F_{(5, 48)} = 11.70$ . Two-way ANOVA with Bonferroni's post hoc test. N = 6 mice/group. In all panels statistical analysis was performed combining both sexes and significance was \* $p < 0.05$ , \*\* $p < 0.001$ , \*\*\* $p < 0.0001$ , and \*\*\*\* $p < 0.00001$  data sets (mean  $\pm$  SEM) as analyzed using two-way ANOVA with Bonferroni's post hoc tests.

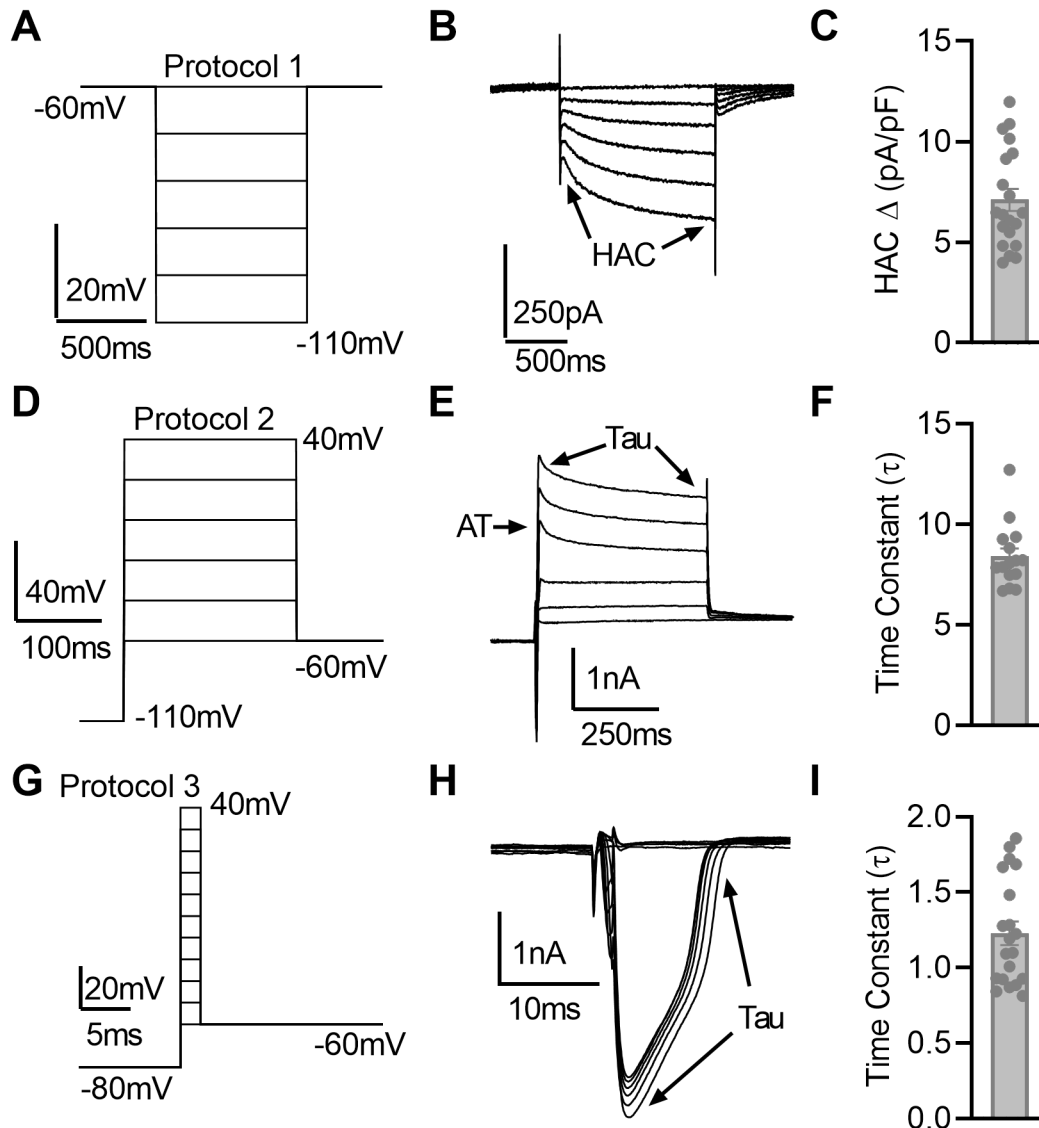

**Supplementary Figure S5. Physiological parameters of morphine-responsive DRG neurons**

**A.** Illustration of Protocol 1, used to characterize hyperpolarization-activated current. **B.** Representative trace of DRG produced by Protocol 1. Hyperpolarization-activated current delta is indicated. **C.** Quantification of hyperpolarization-activated current of nociceptors. **D.** Illustration of Protocol 2. **E.** Representative trace produced by Protocol 2, used to characterize activation threshold and A-current inactivation rate Tau as indicated. **F.** Quantification of nociceptor A-current tau. **G.** Illustration of Protocol 3. **H.** Representative trace produced by Protocol 3, used to determine the inactivation decay constant of the first inward current response as indicated, and the response amplitude. **I.** Quantification of the inactivation decay constant.

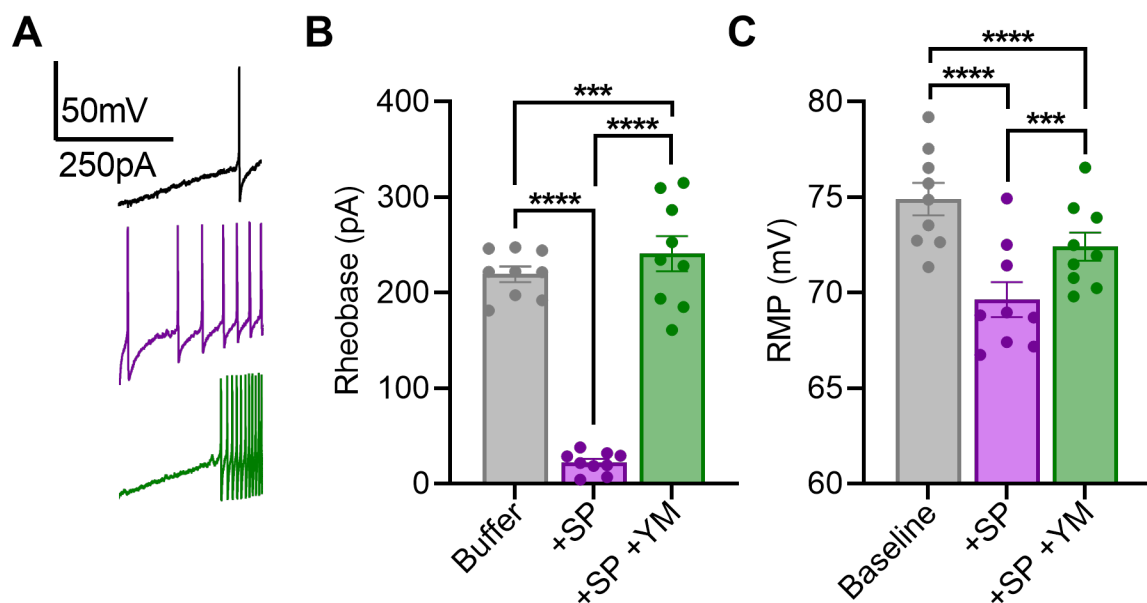

**Supplementary Figure S6. The effect of YM on Substance P induced excitation of DRG nociceptors.**

**A.** Representative voltage traces from a continuous 0-2 nA ramp stimulation protocol illustrating excitability of cultured DRG neurons at baseline (black), and after bath application of 10 nM Substance P (SP, purple) followed by 10 nM SP and 100nM YM (green). **B.** Quantification of rheobase from DRG recordings illustrated in A. Treatment:  $F_{(8, 24)} = 5.812$ . One-way repeated-measures ANOVA with Tukey's multiple comparisons test. **C.** Quantification of resting membrane potential from DRG recordings illustrated in A. Treatment:  $F_{(8, 24)} = 23.16$ . One-way repeated-measures ANOVA with Tukey's multiple comparisons test. Statistical analysis was performed combining both sexes, and significance was  $***p < 0.01$ , and  $****p < 0.0001$ .
